# Supplementary material
Source: Springer Nature journal article supplement (https://www.springermedizin.de/resource/supplementary/12936_2005_178_MOESM5_ESM.pdf/9547064)

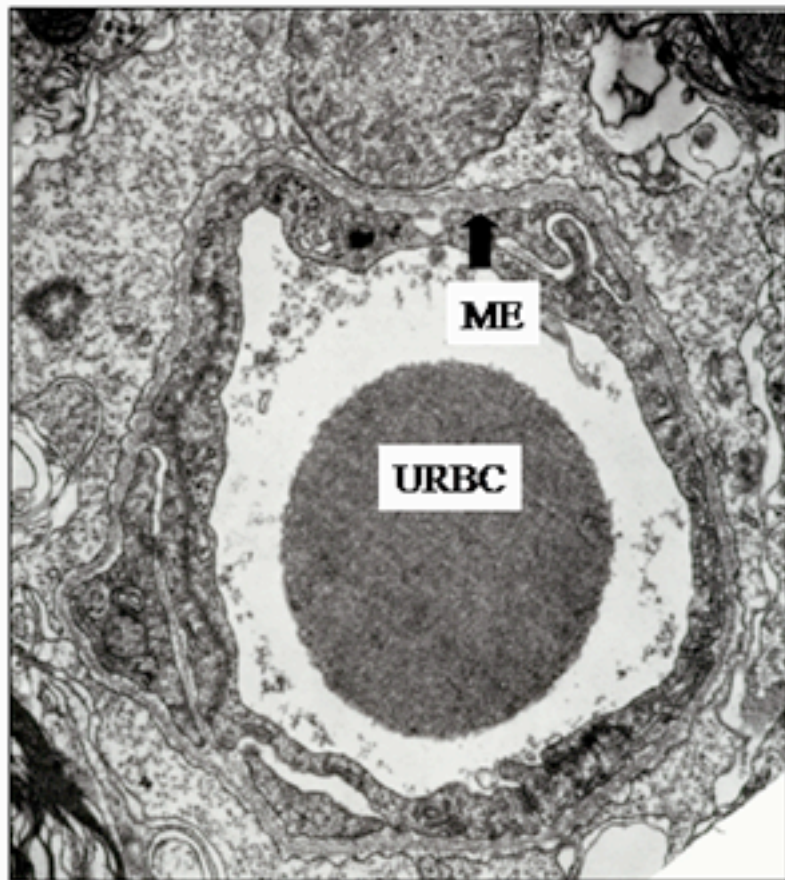

**Uninfected**

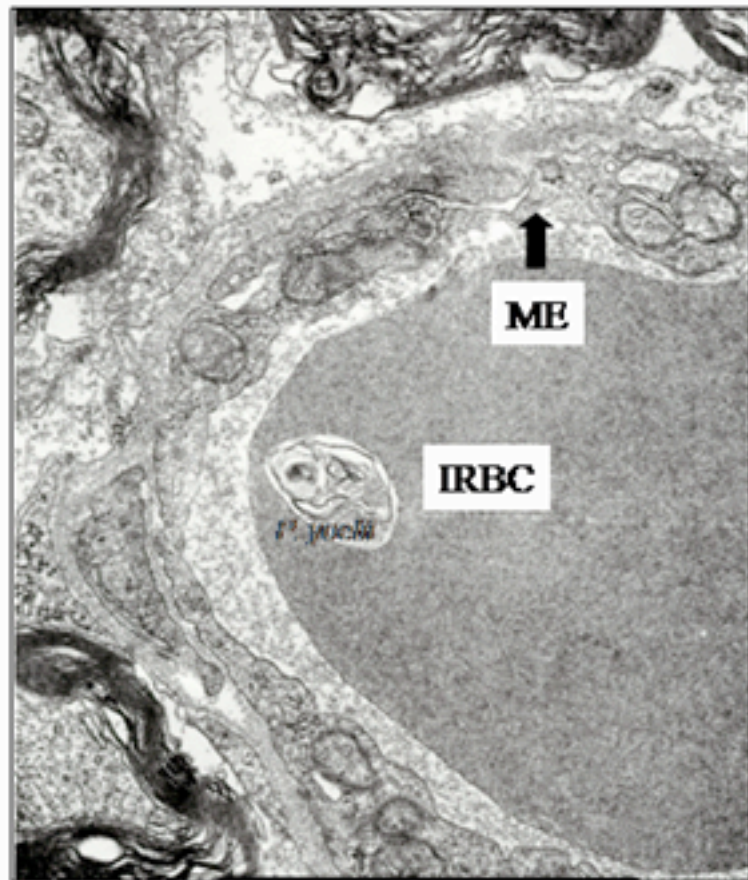

**Infected**

Supplement: MOESM5 [file 9547064]
